# Supplementary material for: Synergistic enhancement of charge extraction and heat dissipation in inverted perovskite solar cells via n-doped top interlayers
Source: Royal Society of Chemistry journal article supplement (doi:10.1039/d4ee02836h), 2024-01-01
Supplement: d4ee02836h1.pdf [file d4ee02836h1.pdf]

## Supporting Information

### **Synergistic Enhancement of Charge Extraction and Heat Dissipation in Inverted Perovskite Solar Cells via n-Doped Top Interlayers**

Sangmi Park, †<sup>a</sup> Sang Young Jeong, †<sup>b</sup> Jaehoon Kim, †<sup>c</sup> Heunjeong Lee, <sup>d</sup> Hye Seung Kim, <sup>a</sup> Young Wook Noh, <sup>a</sup> Ye In Kim, <sup>a</sup> Shinuk Cho, <sup>d</sup> Joon Sang Kang, <sup>\*c</sup> Han Young Woo <sup>\*b</sup> and Myoung Hoon Song <sup>\*a</sup>

<sup>a</sup> S. Park, H. S. Kim, Y. W. Noh, Y. I. Kim, Prof. M. H. Song  
Department of Materials Science and Engineering, Ulsan National Institute of Science and Technology (UNIST), UNIST-gil 50, Ulsan 44919, Republic of Korea.  
\*E-mail: [mhsong@unist.ac.kr](mailto:mhsong@unist.ac.kr)

<sup>b</sup> S. Y. Jeong, Prof. H. Y. Woo  
Department of Chemistry, Korea University, Seoul 02841, Republic of Korea.  
\*E-mail: [hywoo@korea.ac.kr](mailto:hywoo@korea.ac.kr)

<sup>c</sup> J. Kim, Prof. J. S. Kang  
Department of Mechanical Engineering, Korea Advanced Institute of Science and Technology (KAIST), Daejeon 34120, Republic of Korea.  
\*E-mail: [jskang1@kaist.ac.kr](mailto:jskang1@kaist.ac.kr)

<sup>d</sup> H. Lee, Prof. S. Cho  
Department of Physics and EHSRC, University of Ulsan, Ulsan 44610, Republic of Korea.

Keywords: perovskite solar cells, interlayer, n-doping, stability, heat dissipation

## Experimental Section

### Materials

All chemicals utilized in the synthesis and device fabrication were purchased from Sigma-Aldrich, Tokyo Chemical Industry, and Alfa Aesar, and used without additional purification unless otherwise specified. [4-(3,6-Dimethoxy-9H-carbazol-9-yl)ethyl]phosphonic acid (MeO-4PACz, TCI), formamidinium iodide (FAI, Greatcell Solar), lead iodide (PbI<sub>2</sub>, TCI), cesium iodide (CsI, ultra-dry, 99.999% (metal basis), Alfa Aesar), fullerene (C<sub>60</sub>, 99.99%, OSM), and silver (Ag, 1-4 mm shot, 99.9999%, iTASCO).

### Synthesis

[6,6]-Phenyl-C<sub>61</sub>-butyric acid 2-[2-(2-methoxyethoxy)ethoxy]ethyl ester (PC<sub>61</sub>B-TEG) was synthesized by following the previously reported procedures.<sup>1-2</sup>

<sup>1</sup>H NMR (500 MHz, CDCl<sub>3</sub>):  $\delta$  (ppm) 7.94-7.82 (m, 2H), 7.56-7.53 (m, 2H), 7.49-7.46 (m, 1H), 4.25-4.23 (m, 2H), 3.70-3.63 (m, 8H), 3.56-3.54 (m, 2H), 3.38 (s, 3H), 2.93-2.89 (m, 2H), 2.55 (t, 2H,  $J = 7.50$  Hz), 2.22-2.19 (m, 2H).

### Instruments and Characterization

The <sup>1</sup>H NMR spectra were acquired using a Bruker Avance III HD 500 spectrometer. SEM images were captured using SU8220 Cold FE-SEM and SU7000 FE-SEM. AFM images were obtained using Dimension ICON (Bruker Nano Surface). XRD patterns were obtained using an X-ray diffractometer (D/MAX2500C/PC, Rigaku) with a Cu-rotating anode X-ray. The  $J$ - $V$  characteristics of the PeSCs were measured using an Ivium-n-Stat source meter under AM 1.5 G (100 mW cm<sup>-2</sup>) conditions. The EQE spectra were obtained using a QE measurement system (HS Technologies) by employing monochromatic light from a Xe lamp under ambient conditions. TPV and TPC measurements were carried out with a McScience T4000 (organic semiconductor parameter test system) at  $V_{OC}$  under illumination. XPS spectra were obtained by an Escalab 250Xi instrument (Thermo Fisher Co.), utilizing an Al K $\alpha$  monochromatic X-ray

source. Casa XPS software was employed for data analysis. UPS spectra were acquired through a UPS system (AXIS nova, Kratos Analytical), equipped with a helium ultraviolet source of 21.22 eV. The absorbance spectra were measured with a UV-Vis spectrophotometer (Ultrospec 2100 pro, Biochrom). EPR spectra were acquired using an electron spin resonance spectrometer (JEOL, JES-X320).  $I$ - $V$  curves were measured by incrementally raising the DC voltage by 10 mV steps from  $-2V$  to  $+2V$ , measuring the corresponding currents. PLQY was obtained using a UV-NIR absolute PL quantum yield spectrometer (Hamamatsu, C13534) with a high-power Xe lamp. IR camera images were obtained using PI640 microscope optics.

### Device Fabrication

$-0.000$  eV (TzTPT-INCN) and  $-0.000$  eV, respectively (TzCDT-INCN). The ITO-coated substrate ( $1.5 \times 1.5$  cm<sup>2</sup>) was subjected to a cleaning process using ultrasonication with acetone, isopropyl alcohol, and deionized water for 15 minutes each. Subsequently, a 30-minute UV ozone treatment was applied. The ITO was then spin-coated with a 3 mmol MeO-4PACz ethanol solution at 5000 rpm for 30 seconds and heated at 100 °C for 10 minutes. Ethanol rinse at 5000 rpm for 30 seconds followed to remove unattached molecules. Next, a 1.4 M solution of FA<sub>0.85</sub>CS<sub>0.15</sub>PbI<sub>3</sub> in DMF/DMSO (7:3 v/v) was spin-coated onto the MeO-4PACz layer at 500 rpm for 8 seconds, followed by 3000 rpm for 25 seconds. The ethyl acetate (450 μL) was dropped onto the substrate 10 seconds before spinning ended. The resulting perovskite layer was annealed at 100 °C for 50 minutes. Subsequently, the (n-doped) PC<sub>61</sub>B-TEG solution was spin-coated on the perovskite layer at 5000 rpm for 30 seconds and annealed at 100 °C for 10 minutes. A 30 nm-thick C<sub>60</sub> layer was thermally evaporated under high vacuum ( $< 5 \times 10^{-5}$  torr) at an evaporation rate of 0.5 Å. A 100 nm thick Ag electrode was evaporated through a shadow mask, defining the active area to 0.135 cm<sup>2</sup>. Additionally, LiF (70 nm thick) was evaporated on the glass side to mitigate reflection loss from the glass substrate.

### Supplementary note 1

## Thermal conductivity measurement

Thermal conductivity ( $\kappa$ ) measurements were conducted using a time-domain thermoreflectance (TDTR) technique. A detailed description of the measurement principle and experimental setup can be found elsewhere.<sup>3-4</sup> A femtosecond pulsed laser, generated by a Ti:Sapphire oscillator with an 80 MHz repetition rate, was split into pump and probe beams using a half-wave plate and a polarized beam splitter (PBS). The pump beam passed through an electro-optic modulator (EOM) with sinusoidal modulation, followed by frequency doubling through a bismuth borate (BIBO) crystal. The probe beam, delayed by a mechanical stage ranging from 0 to 5000 ps, was coaxially excited with the pump beam at the sample surface. Reflectance changes induced by the pump beam were measured using the probe beam. A thin layer of aluminum film (80 nm) deposited on the top layer of the sample served as an opto-thermal transducer. The thermal conductivity ( $\kappa$ ) of the sample was determined by fitting experimental data to thermal modeling.

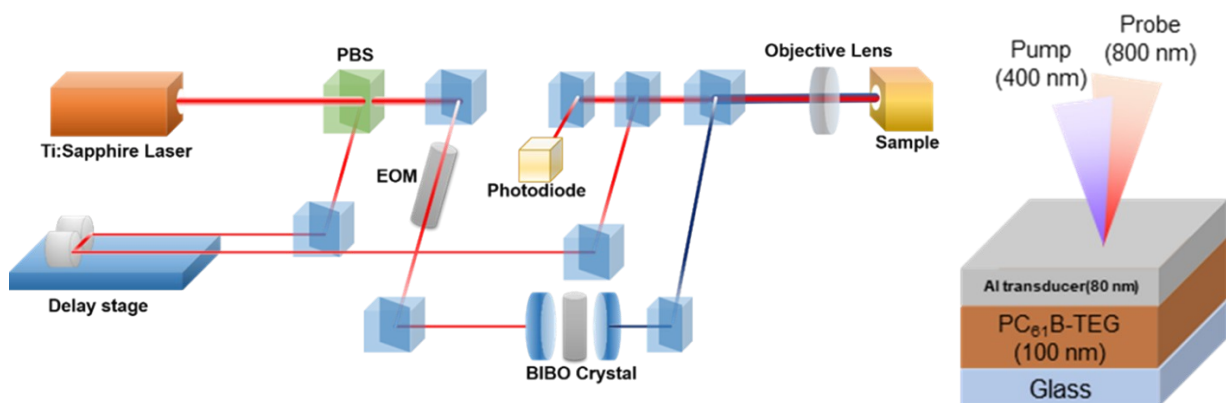

Schematics of TDTR measurement and sample structure.

## Heat capacity measurement

The volumetric heat capacity ( $C_v$ ) of the PC<sub>61</sub>B-TEG samples was estimated by multiplying the specific heat capacity ( $C_p$ ) by the density of PC<sub>61</sub>B-TEG ( $\rho$ ). The  $C_p$  value was obtained from differential scanning calorimetry (DSC) using Q200 (TA Instrument) (see Fig. S5, ESI†), while  $\rho$  was approximated to the density of [6,6]-phenyl C<sub>61</sub> butyric acid methyl ester (PCBM) at 1.5 g/cm<sup>3</sup>. The  $C_p$  was measured using a step scan isothermal method from 20 to 30 °C with a scan rate of 0.1 °C/minute and a 10-minute hold at every interval.

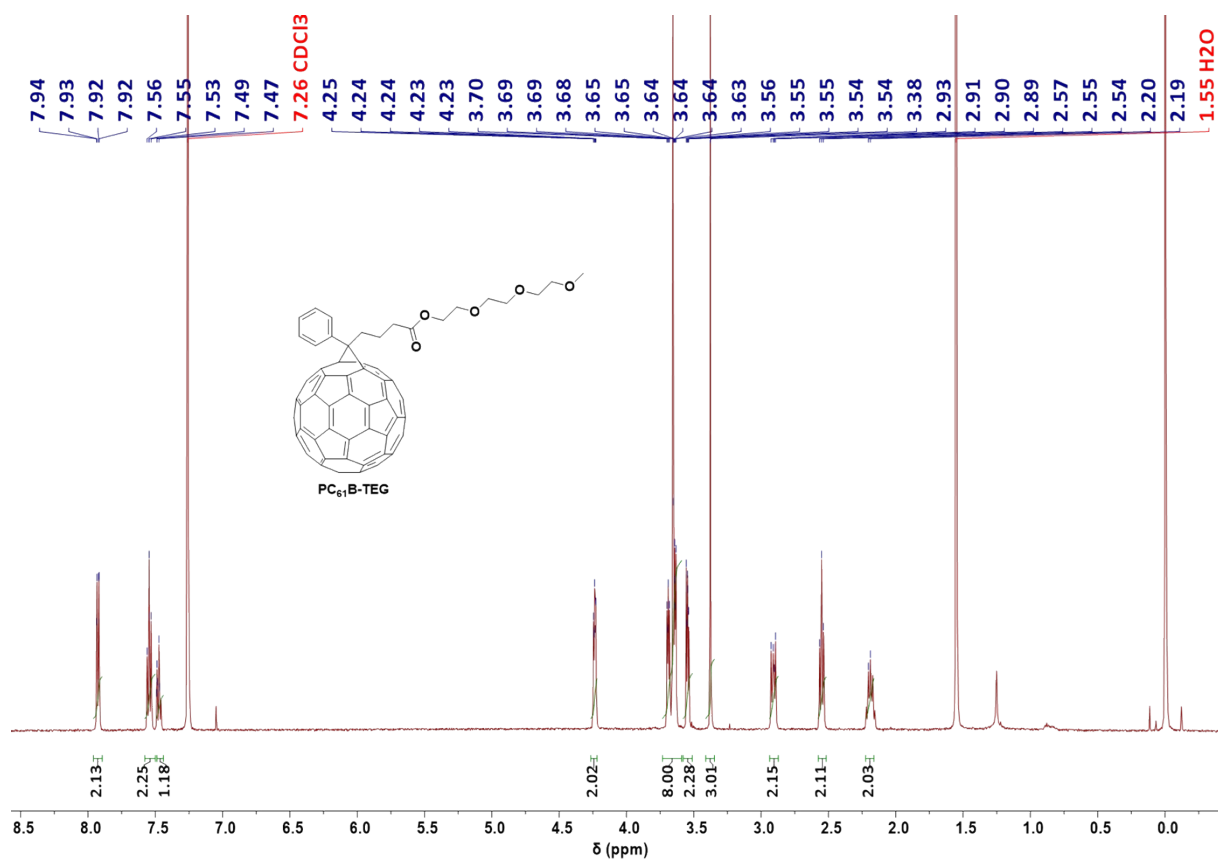

**Fig. S1** <sup>1</sup>H-NMR spectrum of PC<sub>61</sub>B-TEG in CDCl<sub>3</sub>.

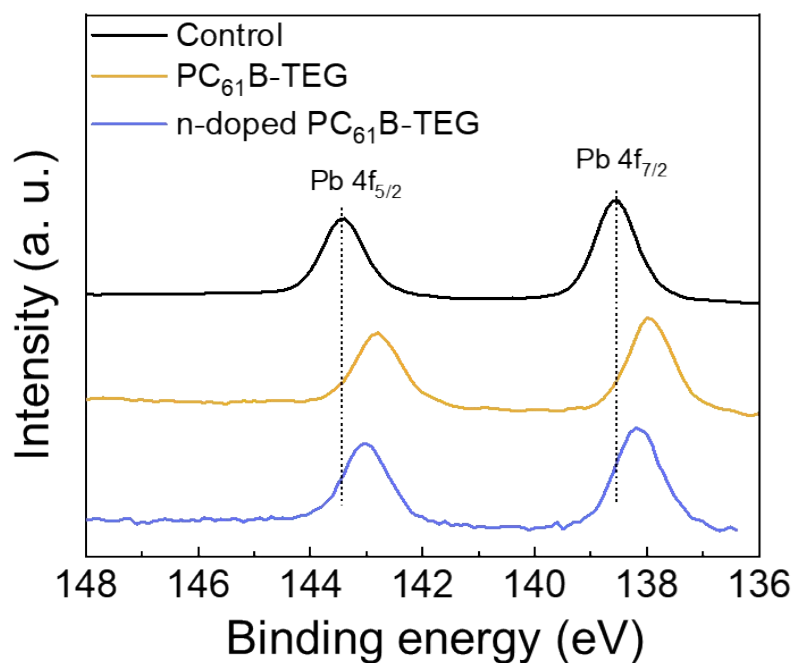

**Fig. S2** Pb 4f XPS spectra of perovskite films with and without PC<sub>61</sub>B-TEG and n-doped PC<sub>61</sub>B-TEG.

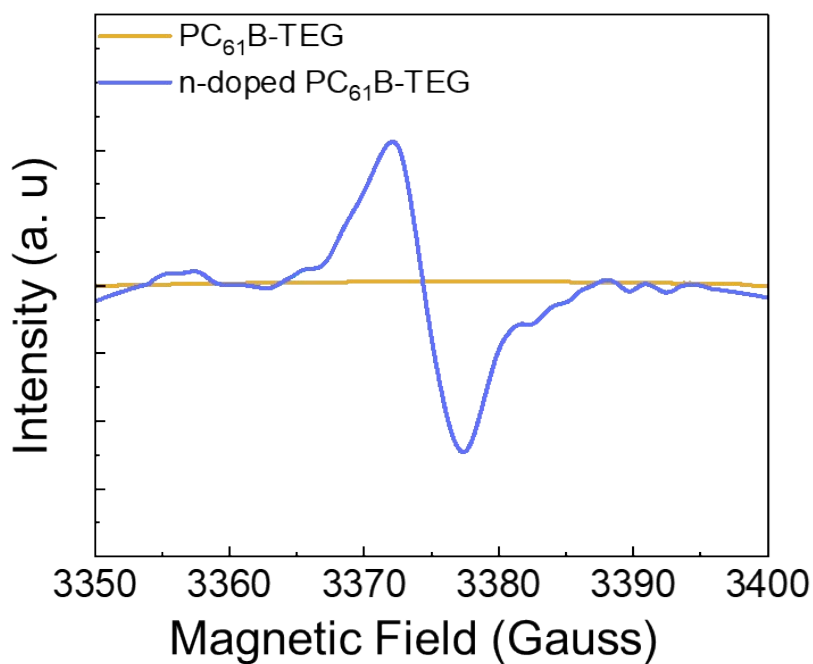

**Fig. S3** EPR signal of PC<sub>61</sub>B-TEG doped with N-DMBI as dopant.

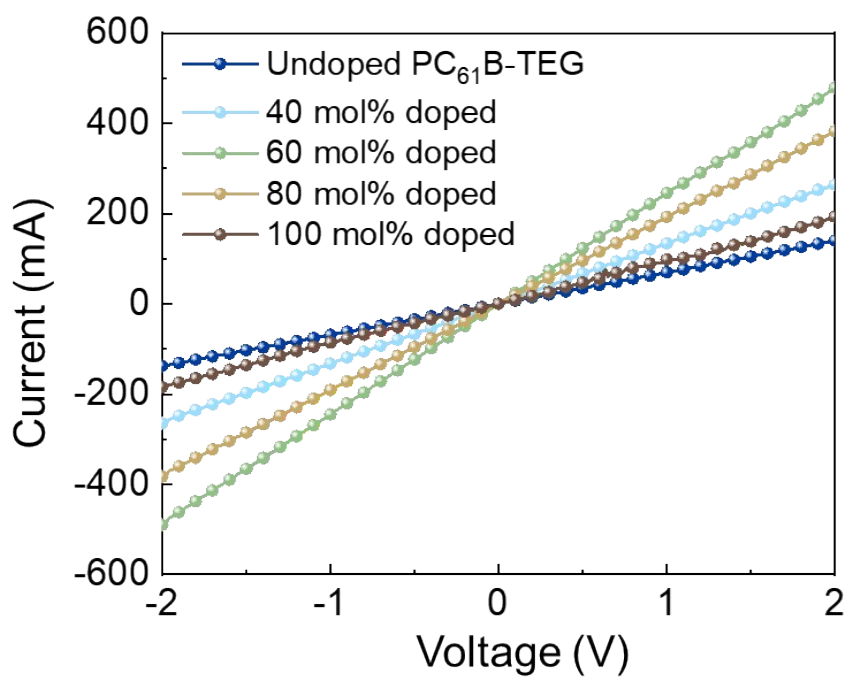

**Fig. S4** Electrical conductivity of PC<sub>61</sub>B-TEG films depending on doping concentration.

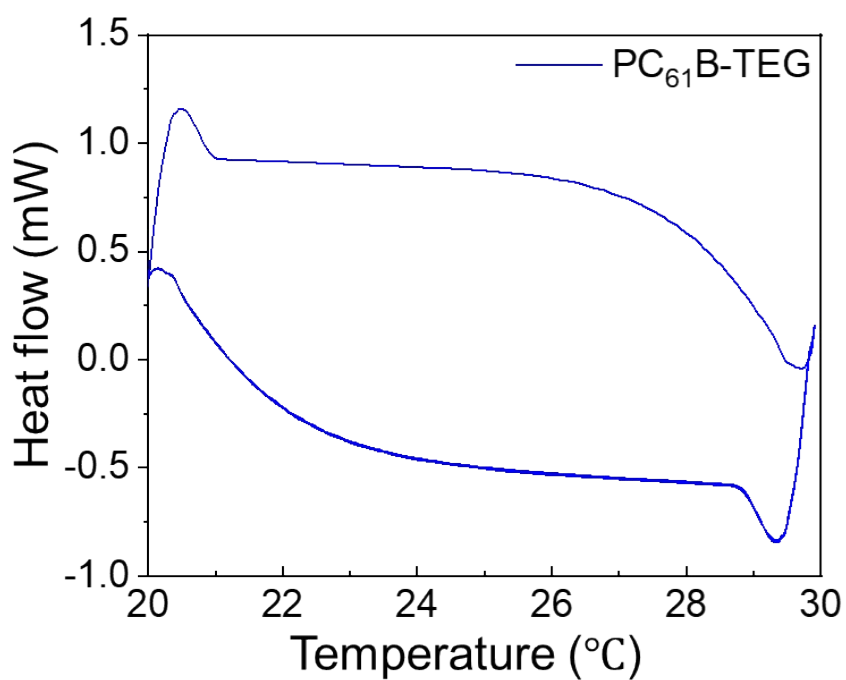

**Fig. S5** DSC thermogram of PC<sub>61</sub>B-TEG.



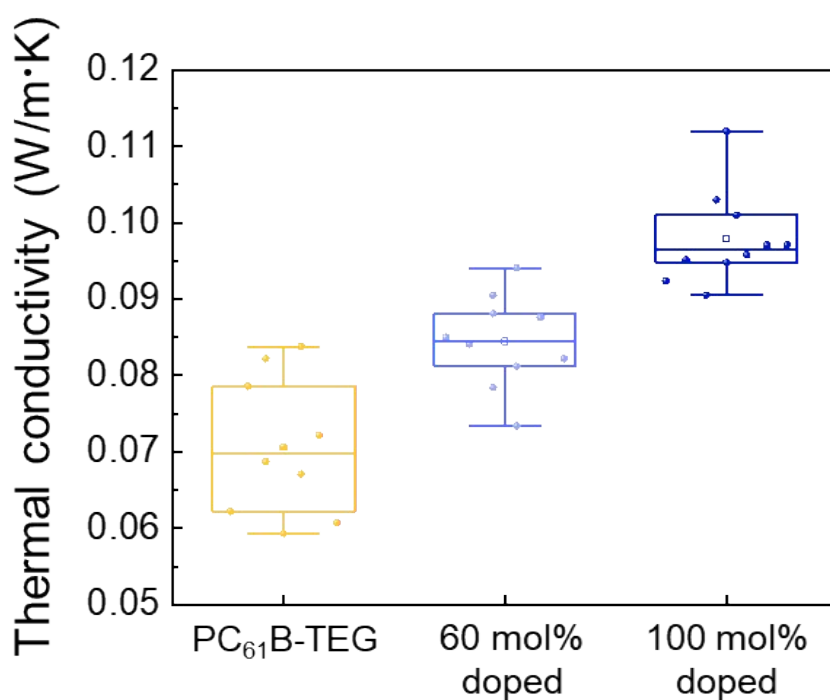

**Fig. S6** Thermal conductivity statistics of undoped PC<sub>61</sub>B-TEG and PC<sub>61</sub>B-TEG doped with N-DMBI (60 and 100 mol%).

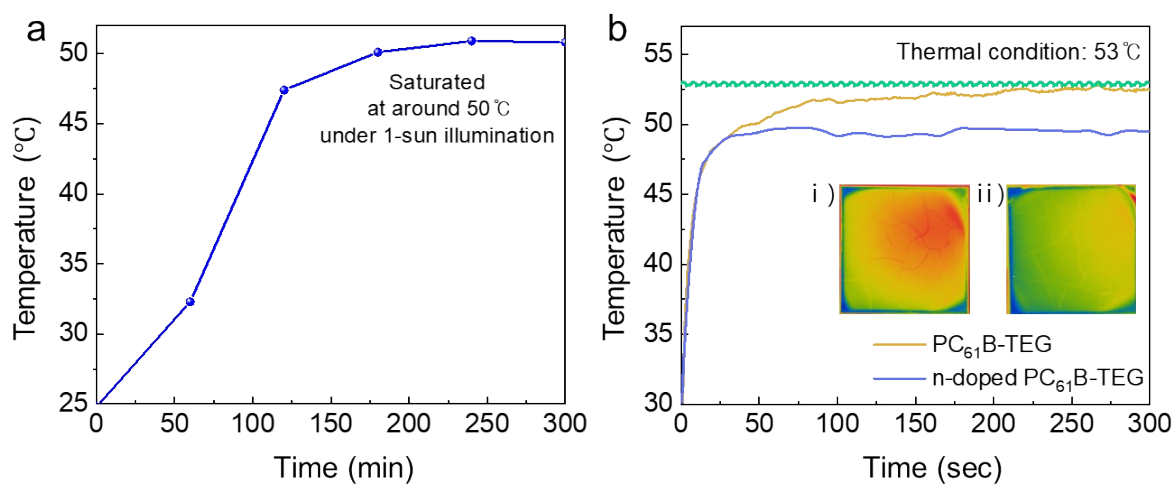

**Fig. S7** (a) Temperature increment under 1-sun illumination condition of AM 1.5 G ( $100 \text{ mW cm}^{-2}$ ) (b) Temperature profiles of perovskite/PC<sub>61</sub>B-TEG film with and without n-doping under  $53 \text{ }^\circ\text{C}$  continuous heat. Insets are IR camera images of perovskite/PC<sub>61</sub>B-TEG films of i) without and ii) with n-doping heated continuously for 5 minutes at  $53 \text{ }^\circ\text{C}$ .

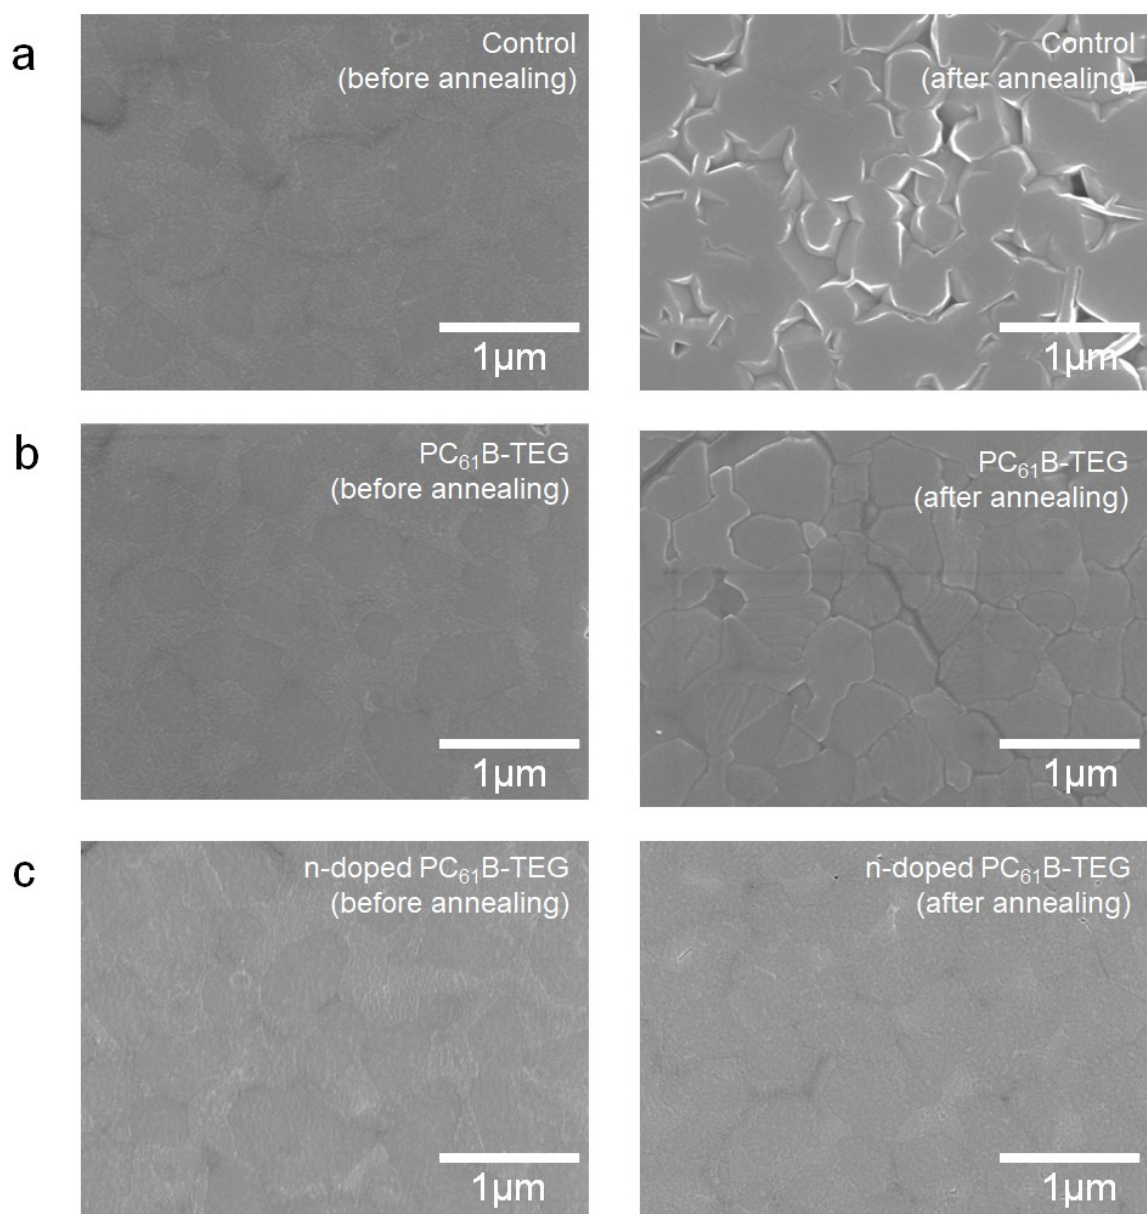

**Fig. S8** SEM images of the bottom side perovskite films (a) without (control) and (b) with PC<sub>61</sub>B-TEG, and (c) n-doped PC<sub>61</sub>B-TEG. The “after annealing” samples were heated at 120 °C for 72 hours in N<sub>2</sub>.

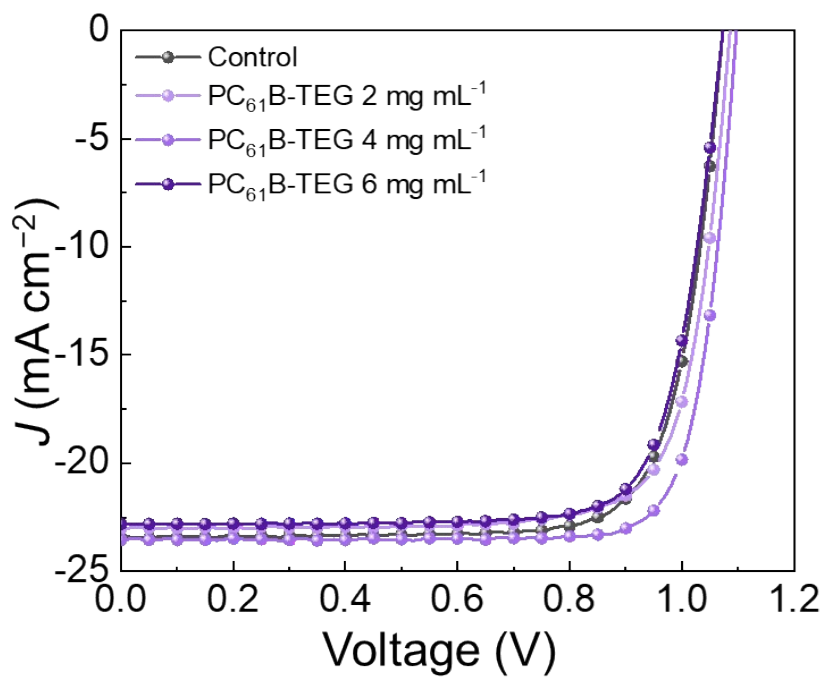

**Fig. S9**  $J$ - $V$  curve of PeSCs with a  $\text{PC}_{61}\text{B-TEG}$  top interlayer with variation of its concentration.

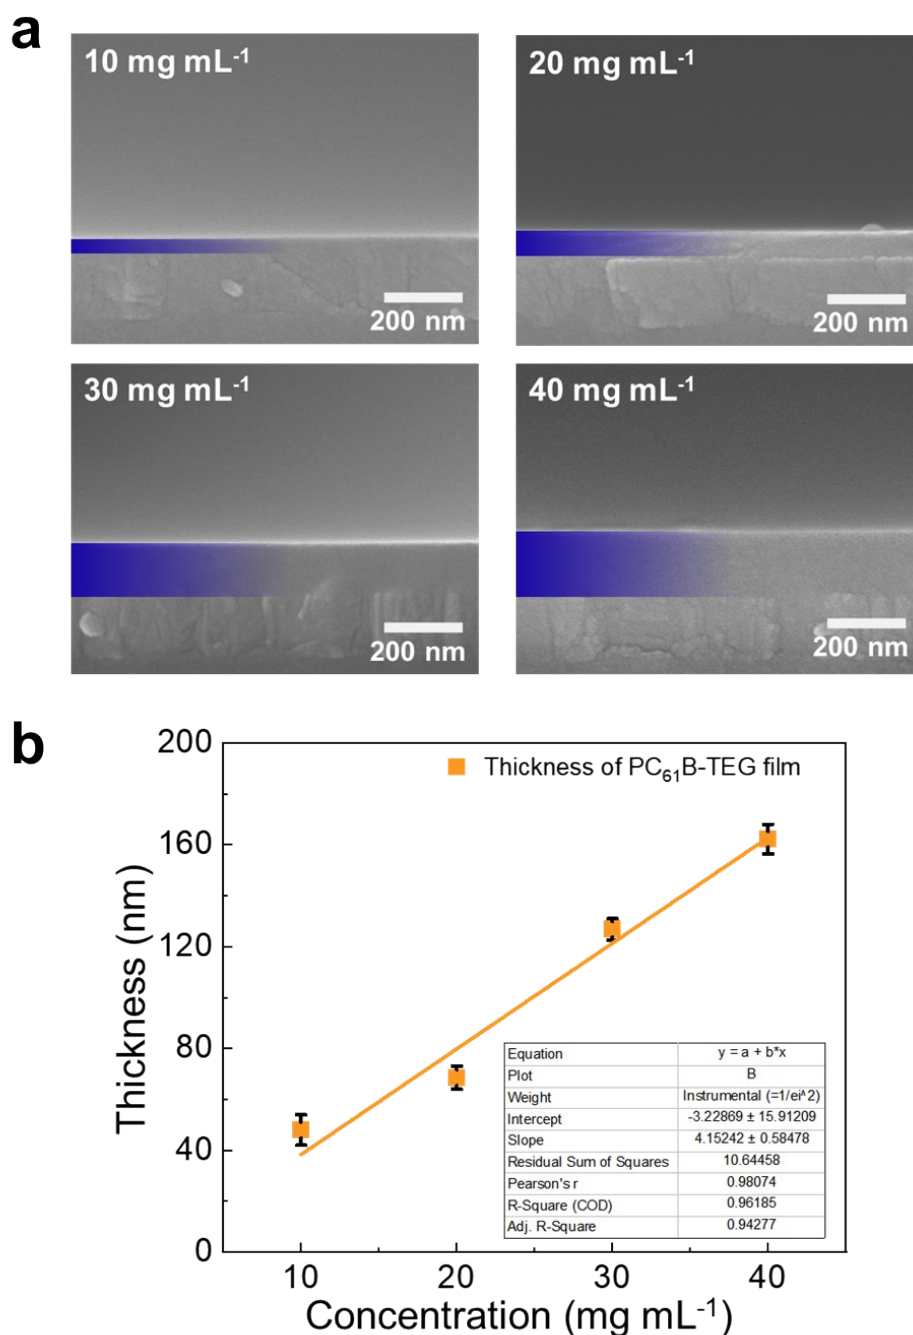

**Fig. S10** Thickness confirmation of PC<sub>61</sub>B-TEG (a) SEM images of cross-sections PC<sub>61</sub>B-TEG depend on various concentration. PC<sub>61</sub>B-TEG films are fabricated by spin coating PC<sub>61</sub>B-TEG solutions (dissolved in chloroform) in 5000 rpm for 30 sec on ITO substrates. (b) Correlation between the concentration of PC<sub>61</sub>B-TEG solution and thickness of PC<sub>61</sub>B-TEG film.

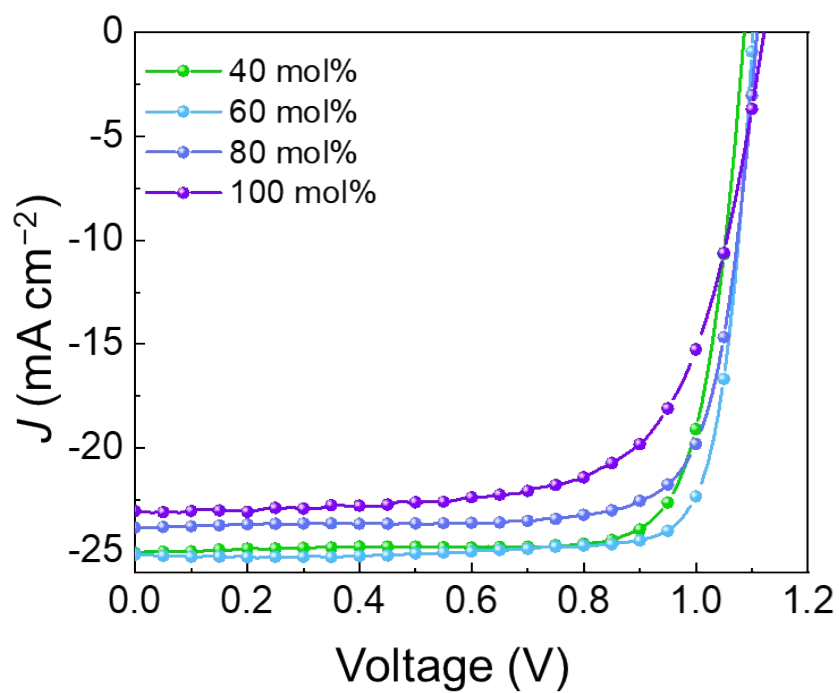

**Fig. S11**  $J$ - $V$  curve of PeSCs with n-doped  $\text{PC}_{61}\text{B}$ -TEG interlayer by varying doping concentration.

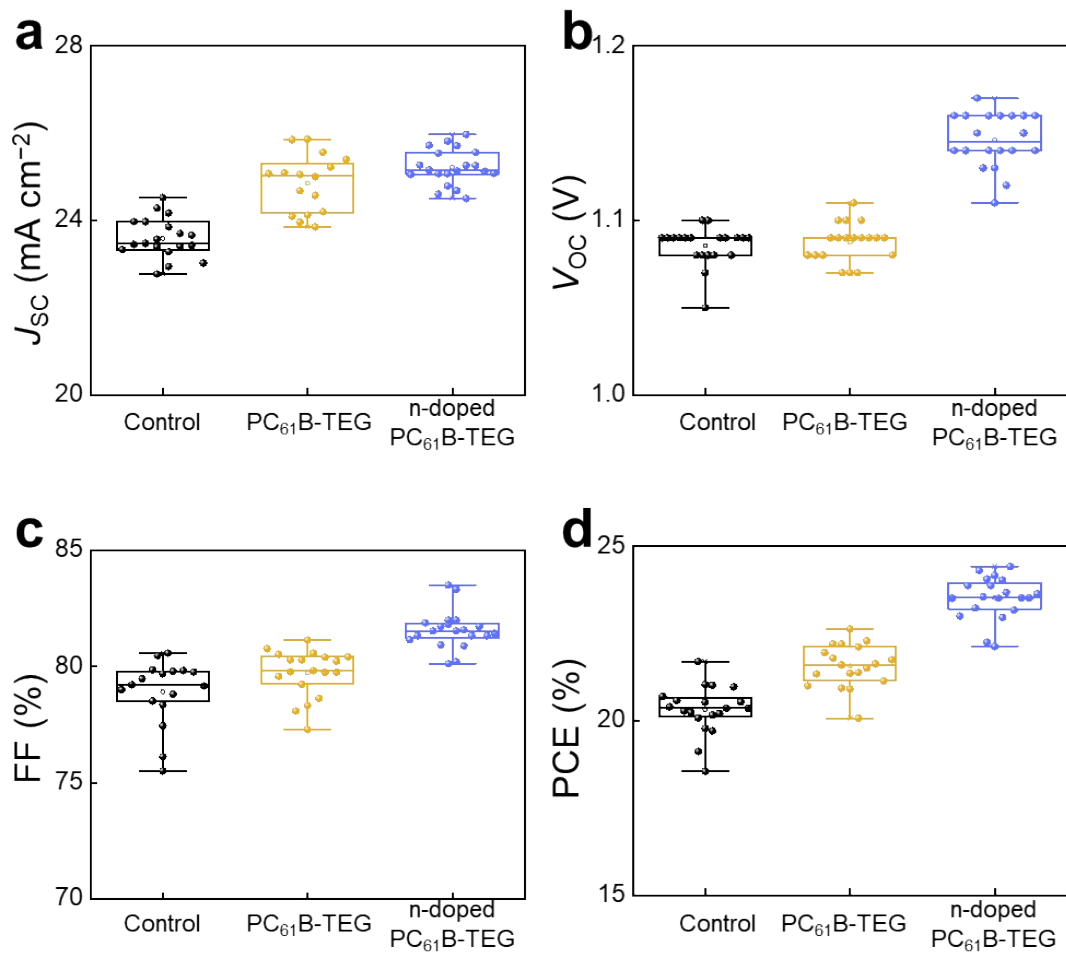

**Fig. S12** Statistics of photovoltaic parameters of PeSCs (a)  $J_{SC}$ , (b)  $V_{OC}$  (c) FF and (d) PCE of control, PC<sub>61</sub>B-TEG and n-doped PC<sub>61</sub>B-TEG .

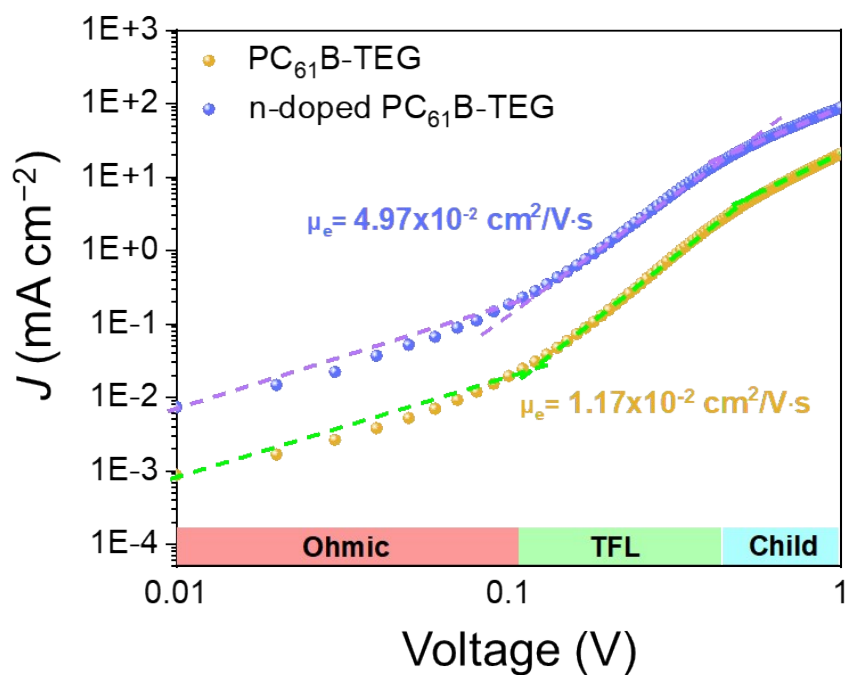

**Fig. S13** SCLC curves of electron-only devices with an architecture of ITO/SnO<sub>2</sub>/(n-doped) PC<sub>61</sub>B-TEG/LiF/Ag.

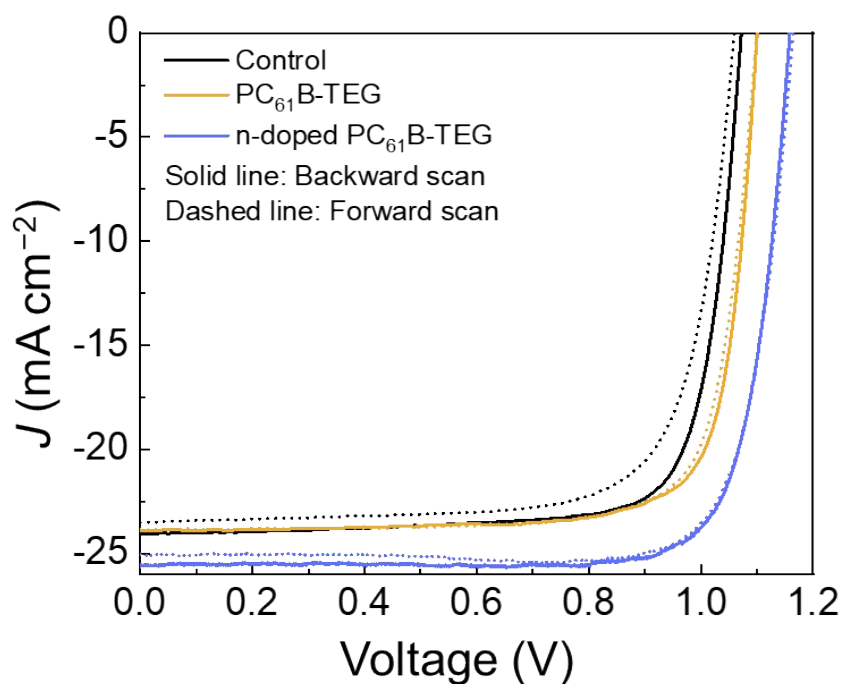

**Fig. S14**  $J$ - $V$  curves of Control, PC<sub>61</sub>B-TEG and n-doped PC<sub>61</sub>B-TEG treated PeSCs under forward and backward scans.

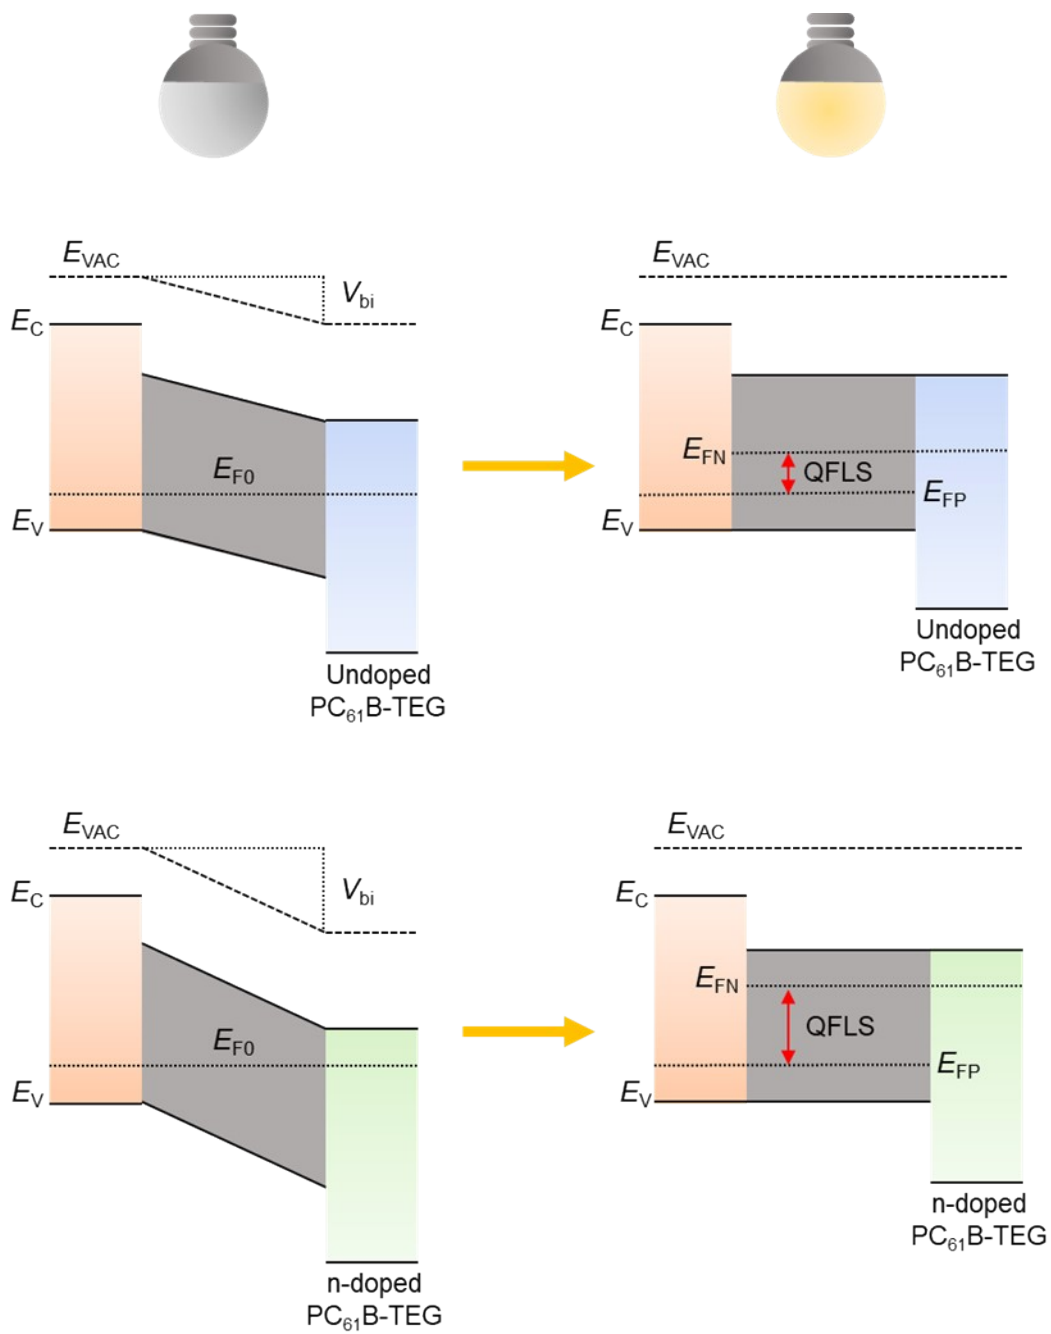

**Fig. S15** Illustrations of QFLS in PeSCs with undoped PC<sub>61</sub>B-TEG and n-doped PC<sub>61</sub>B-TEG interlayers.



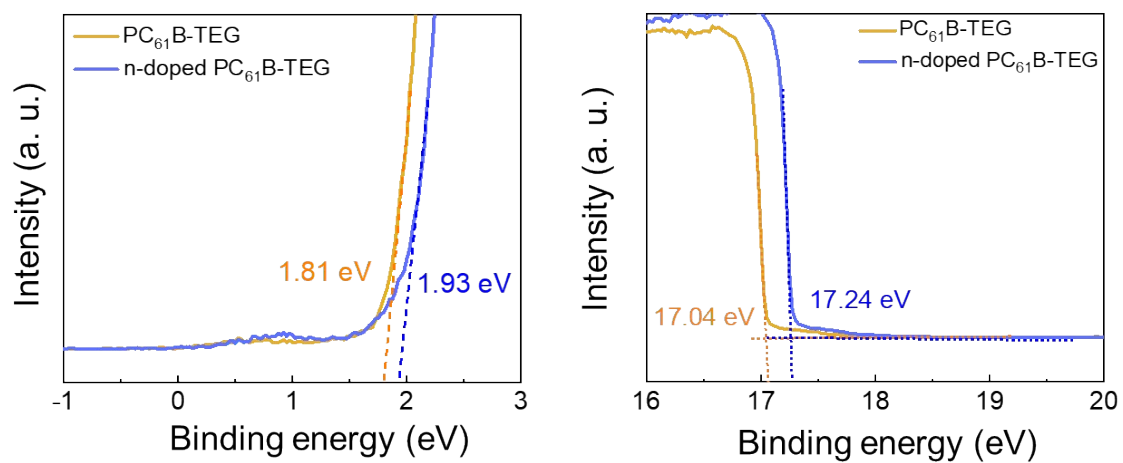

**Fig. S16** UPS measurement of PC<sub>61</sub>B-TEG and n-doped PC<sub>61</sub>B-TEG in optimized doping concentration.

**Table S1** Resistance and electrical conductivity of PC<sub>61</sub>B-TEG and n-doped PC<sub>61</sub>B-TEG films (40, 60, 80, 100 mol%).

| Doping concentration   | Resistance [Ω] | Conductivity [S cm <sup>-1</sup> ] |
|------------------------|----------------|------------------------------------|
| PC <sub>61</sub> B-TEG | 14.27          | 4.41 × 10 <sup>-4</sup>            |
| 40 mol%                | 7.54           | 1.19 × 10 <sup>-3</sup>            |
| 60 mol%                | 4.13           | 2.17 × 10 <sup>-3</sup>            |
| 80 mol%                | 5.24           | 1.17 × 10 <sup>-3</sup>            |
| 100 mol%               | 10.87          | 8.24 × 10 <sup>-4</sup>            |

**Table S2** XRD peak area ratios of PbI<sub>2</sub>/(100) for control, PC<sub>61</sub>B-TEG, and n-doped PC<sub>61</sub>B-TEG treated cells before and after thermal treatment at 120 °C for 72 hours.

|                                | PbI <sub>2</sub> /(100) before treatment | PbI <sub>2</sub> /(100) after treatment |
|--------------------------------|------------------------------------------|-----------------------------------------|
| Control                        | 0.186                                    | 3.128                                   |
| PC <sub>61</sub> B-TEG         | 0.166                                    | 1.492                                   |
| n-doped PC <sub>61</sub> B-TEG | 0.101                                    | 0.197                                   |

**Table S3** Photovoltaic parameters of PeSCs with undoped PC<sub>61</sub>B-TEG interlayer.

| Concentration of PC <sub>61</sub> B-TEG | <i>J</i> <sub>sc</sub> [mA cm <sup>-2</sup> ] | <i>V</i> <sub>oc</sub> [V] | FF [%] | PCE [%] |
|-----------------------------------------|-----------------------------------------------|----------------------------|--------|---------|
| Control                                 | 23.43                                         | 1.07                       | 76.93  | 19.47   |
| 2 mg mL <sup>-1</sup>                   | 23.04                                         | 1.09                       | 77.53  | 19.47   |
| 4 mg mL <sup>-1</sup>                   | 23.67                                         | 1.1                        | 81.45  | 21.11   |
| 6 mg mL <sup>-1</sup>                   | 22.81                                         | 1.08                       | 77.44  | 19.08   |

**Table S4** Photovoltaic parameters of PeSCs with undoped PC<sub>61</sub>B-TEG interlayer.

| Doping concentration | <i>J</i> <sub>sc</sub> [mA cm <sup>-2</sup> ] | <i>V</i> <sub>oc</sub> [V] | FF [%] | PCE [%] |
|----------------------|-----------------------------------------------|----------------------------|--------|---------|
| 40 mol%              | 25.05                                         | 1.09                       | 79.24  | 21.64   |
| 60 mol%              | 25.13                                         | 1.11                       | 81.82  | 22.83   |
| 80 mol%              | 22.71                                         | 1.12                       | 71.58  | 18.21   |
| 100 mol%             | 23.02                                         | 1.13                       | 68.53  | 17.83   |

**Table S5** Photovoltaic parameters of control and (n-doped) PC<sub>61</sub>B-TEG treated PeSCs under backward and forward scans.

| Device                            | Scan direction | $V_{OC}$<br>[V] | $J_{SC}$<br>[mA cm <sup>-2</sup> ] | FF<br>[%] | PCE<br>[%] | HI <sup>a)</sup><br>[%] |
|-----------------------------------|----------------|-----------------|------------------------------------|-----------|------------|-------------------------|
| Control                           | Backward       | 1.08            | 24.05                              | 77.78     | 20.21      | 8.21                    |
|                                   | Forward        | 1.05            | 23.51                              | 75.10     | 18.55      |                         |
| PC <sub>61</sub> B-TEG            | Backward       | 1.11            | 23.88                              | 78.79     | 20.89      | 1.15                    |
|                                   | Forward        | 1.09            | 23.84                              | 79.48     | 20.65      |                         |
| n-doped<br>PC <sub>61</sub> B-TEG | Backward       | 1.16            | 25.60                              | 80.36     | 23.85      | 0.88                    |
|                                   | Forward        | 1.16            | 25.05                              | 80.99     | 23.64      |                         |

a) Hysteresis index.

## References

1. K. Kim, Z. Wu, J. Han, Y. Ma, S. Lee, S.-K. Jung, J.-W. Lee, H. Y. Woo and I. Jeon, *Adv. Energy Mater.*, 2022, **12**, 2200877
2. M. P. Hughes, K. D. Rosenthal, R. R. Dasari, B. R. Luginbuhl, B. Yurash, S. R. Marder and T.-Q. Nguyen, *Adv. Func. Mater.*, 2019, **29**, 1901269.
3. D. G. Cahill, *Rev. Sci. Instrum.*, 2004, **75**, 5119.
4. A. J. Schmidt, X. Chen and G. Chen, *Rev. Sci. Instrum.*, 2008, **79**, 114902.
